# Supplementary material
Source: PubMed Central journal article supplement (PMC2669330)
Supplement: 0901043106_0901043106SI.pdf [file 0901043106_0901043106SI.pdf]

# Supporting Information

Lima et al. 10.1073/pnas.0901043106

## SI Materials and Methods

**Assessment of LV Area at Risk.** Mouse hearts were harvested and the area of the LV at risk for ischemic injury was determined by trypan blue staining of the myocardium via a cannula inserted into the proximal ascending aorta. Transverse sections of the heart were cut and digitally photographed and then counterstained with triphenyltetrazolium chloride (TTC) to delineate infarcted myocardium, as described previously (1).

**Histological Evaluation of Infarct Size.** Mice were euthanized 12 weeks after coronary artery ligation and hearts were arrested in diastole by injection of 300  $\mu$ L saturated KCl into the right atrium. The hearts were harvested and the LV was cut at the level of the LAD suture. As previously described, myocardial segments were prepared for biochemical and histological assessment (2). The determination of infarct size was performed using computer-assisted image analysis software (ImageJ, National Institutes of Health).

**Immunohistochemistry.** Freshly harvested mouse hearts were saturated in 30% sucrose in phosphate buffered saline (PBS) solution at 4 °C for 2–4 h, placed in optimal cutting temperature medium (OCT, Miles Pharmaceuticals), and snap-frozen in liquid nitrogen. Frozen sections were cut on a cryostat and postfixed in 4% paraformaldehyde. Capillary density was measured by CD31 immunostaining, as described previously (3). Capillary density was quantified by counting CD31<sup>+</sup> endothelial cells in 6–10 random high-power fields (magnification, 400 $\times$ ) on an inverted light microscope. Photographs were taken using a PAXcam ARC digital camera interfaced with Adobe Photoshop CS, and images were analyzed using ImageJ image analysis software.

**Miniosmotic Pump Implantation.** Miniosmotic pumps (Alzet model 1007D; DURECT) were implanted 24 h before left coronary ligation. *S*-nitrosoglutathione (GSNO) was dissolved in PBS containing 100  $\mu$ M DTPA, and pumps were programmed to infuse GSNO at a rate of 10 mg/kg/d over a period of 72 h. Control mice were implanted with pumps that delivered vehicle alone (PBS plus 100  $\mu$ M DTPA).

**Myocardial Oxygenation Measurements.** Myocardial oxygen partial pressure was measured in WT and GSNOR<sup>-/-</sup> mice using the OxyLite oxygen sensors (Oxford Oxtronix). A loose suture was placed around the LAD artery as described above and a small track was made using a 24-gauge needle into the anterolateral aspect of the left ventricle distal to the LAD ligation. The OxyLite probe was inserted into the needle track and suspended in the myocardium for tissue oxygenation measurements at baseline and at 15 min after LAD ligation. Baseline oxygen measurements were recorded for 5 minutes after tissue oxygen readings had stabilized.

**Coronary Anatomy Determination Using Silicone Casts.** For structural elucidation of the coronary anatomy of WT and GSNOR<sup>-/-</sup> mice, casts of the coronary tree were created using Silastic sealant (Dow Corning) as described previously (4).

**Immunoblotting.** Immunoblotting was performed as described previously (3) using the indicated antibodies. Detection was carried out using ECL (Amersham Biosciences), and bands were

quantified by densitometry using Bio-Rad Fluoro-S Multimage software.

**VEGF ELISA.** Myocardial tissue was homogenized at 4 °C with a Polytron tissue homogenizer in 2 mL of RIPA buffer (150 mM NaCl, 50 mM Tris pH 8.0, 5 mM EDTA, 1% Nonidet P-40, 0.5% deoxycholate, 10 mM NaF, 10 mM disodium pyrophosphate, 1 mM PMSF, 2  $\mu$ g/mL aprotinin, 2  $\mu$ g/mL leupeptin, 1 mM Na orthovanadate). Total protein concentration in each sample was determined using the Bradford method (BioRad), and VEGF concentration was analyzed in triplicate using the Quantikine VEGF ELISA kit (R&D Systems) as described previously (5).

**Generation of Replication-deficient Recombinant Adenovirus.** Recombinant adenoviruses were produced using the AdEasy system (Qbiogene) as described previously (6). Briefly, the firefly luciferase cDNA was subcloned into the pShuttle vector downstream of 4 tandem HIF response elements (HRE-luc), following site-directed mutagenesis of its internal PacI restriction site. Recombination between pShuttle-HRE-luc and pAdEasy-1 was carried out in BJ5183 *E. coli* (Qbiogene), and recombinant adenoviral plasmid DNA was linearized with PacI and transfected into HEK293 cells. High titer viral stocks ( $\approx 1 \times 10^{10}$  plaque forming units/mL) were obtained after amplification in HEK293 cells and purification by CsCl gradient ultracentrifugation. AdHRE-luc was verified by infecting HeLa cells that had been transiently transfected with a vector expressing stabilized HIF-1 $\alpha$  (pcDNA3-HIF-1 $\alpha$ <sup>P402A, P564G</sup>) or empty vector as a control. After 24 h, luciferase assays were performed to assess HIF-1 $\alpha$ -mediated luciferase activity.

**In Vivo Bioluminescence Imaging.** A total of  $1 \times 10^5$  viral particles of AdHRE-luc or control empty adenoviral vectors (AdEV) were injected into the apex of the myocardium of GSNOR<sup>-/-</sup> and WT littermate control mice. On days 3 and 6 postinfection, luciferase expression was measured in vivo following i.p. injection of luciferin (150 mg/kg; Xenogen) 10 min before imaging. Animals were placed into the Xenogen IVIS system, consisting of a light-tight chamber connected to a charge-coupled device camera system. Luciferase-mediated photon emission was quantified using Living Image software (Xenogen). The animals were then euthanized, and hearts were extracted, immediately flash frozen in liquid nitrogen, and stored at -80 °C for subsequent PCR and luciferase assay analyses.

**Luciferase PCR Protocol.** Frozen heart samples were ground into a fine powder with a mortar and pestle and then divided in half for protein and DNA analysis. Ground tissue samples were processed using the QIAamp Mini Kit from Qiagen, according to the manufacturer's instructions. DNA isolated from each sample was quantified using a BioRad SmartSpec Plus and 1 ng of DNA was used for amplification by PCR with the following primers: 5'-AGA CGC CAA AAA CAT AAA GAA AGG CCC GGC-3'; 5'-TAT AAA TGT CGT TCG CGG GCG CAA CTG CAA-3'.

**Luminometry.** Ground tissues were suspended in 200  $\mu$ L Passive Lysis Buffer (Promega), and protein concentrations were determined using the BioRad RcdC protein assay kit. Triplicate 10  $\mu$ L samples were mixed with 100  $\mu$ L of Luciferase Assay Reagent (Promega) in wells of a 96-well plate. Luciferase activity was measured using a Veritas luminometer (Turner Biosystems) with

an integration time of 10 sec. Luminescence in each sample was normalized per microgram of protein.

**Densitometry.** All Western blotting signals were quantitated by ImageJ (National Institutes of Health) and expressed as the relative ratio of protein to its histone loading control. The relative ratio of protein to histone in WT mice was arbitrarily set at 1. Data are expressed as mean  $\pm$  SEM.

**Biotin Switch Assay for Protein S-nitrosylation.** The Biotin Switch assay was performed on nuclear extracts of mouse hearts as previously described (7). The samples were then analyzed by SDS/PAGE, followed by immunoblotting with anti-HIF-1 $\alpha$  (1:1,000) antibodies to determine S-nitrosylation of HIF-1 $\alpha$ .

**Chromatin Immunoprecipitation Assay (ChIP).** W293 cells were treated with increasing concentrations of GSNO for 5 h and then harvested for ChIP analysis, as previously described (8). Chromatin was immunoprecipitated with an anti-HIF1 $\alpha$  antibody (Upstate Biotechnology, Cat. No. 07–628). PCR amplification of

the immunoenriched DNA samples was performed using primers for the VEGF promoter (CCTCAGTTCCCTGGCAA-CATCTG and GAAGAATTTGGCACCAAGTTTGT) and detected by agarose gel electrophoresis.

**Bone Marrow Harvest and Progenitor Cell Quantification.** Bone marrow (BM) was collected from the femurs of 10-week-old male GSNOR<sup>-/-</sup> and WT mice, as described previously (9). BM contents were washed with Hanks' Balanced Salt Solution, filtered, and blocked using an anti-mouse CD16/32 FcR blocker (eBioscience). BM cells were labeled with the dead cell discriminator ethidium monoazide and a mixture of lineage-specific antibodies against CD3, CD5, CD8, B220/CD45RA, Mac1/CD11b, Gr1, Ter119 and thy-1 (Miltenyi Biotech); APC-conjugated c-Kit, (BD PharMingen); FITC-conjugated Sca-1 (BD PharMingen); and PE-conjugated VEGFR-2 (eBioscience) monoclonal antibodies. Hematopoietic stem cells were characterized as lineage-depleted cells that expressed c-Kit and Sca-1; endothelial progenitor cells were defined as HSCs that also expressed VEGFR-2.

1. Parsa CJ, et al. (2004) Cardioprotective effects of erythropoietin in the reperfused ischemic heart: A potential role for cardiac fibroblasts. *J Biol Chem* 279:20655–20662.
2. Curcio A, et al. (2006) Competitive displacement of phosphoinositide 3-kinase from beta-adrenergic receptor kinase-1 improves postinfarction adverse myocardial remodeling. *Am J Physiol Circ Physiol* 291:H1754–1760.
3. Perrino C, et al. (2006) Intermittent pressure overload triggers hypertrophy-independent cardiac dysfunction and vascular rarefaction. *J Clin Invest* 116:1547–1560.
4. Kumar D, et al. (2005) Distinct mouse coronary anatomy and myocardial infarction consequent to ligation. *Coron Artery Dis* 16:41–44.
5. Cherwek DH, Hopkins MB, Thompson MJ, Annex BH, Taylor DA (2000) Fiber type-specific differential expression of angiogenic factors in response to chronic hindlimb ischemia. *Am J Physiol Heart Circ Physiol* 279:H932–H938.
6. Huang J, Kontos CD (2002) PTEN modulates vascular endothelial growth factor-mediated signaling and angiogenic effects. *J Biol Chem* 277:10760–10766.
7. Jaffrey SR, Erdjument-Bromage H, Ferris CD, Tempst P, Snyder SH (2001) Protein S-nitrosylation: A physiological signal for neuronal nitric oxide. *Nat Cell Biol* 3:193–197.
8. Yu P, Kodadek T (2007) Dynamics of the hypoxia-inducible factor-1-vascular endothelial growth factor promoter complex. *J Biol Chem* 282:35035–35045.
9. Chen BJ, Cui X, Sempowski GD, Domen J, Chao NJ (2004) Hematopoietic stem cell dose correlates with the speed of immune reconstitution after stem cell transplantation. *Blood* 103:4344–4352.

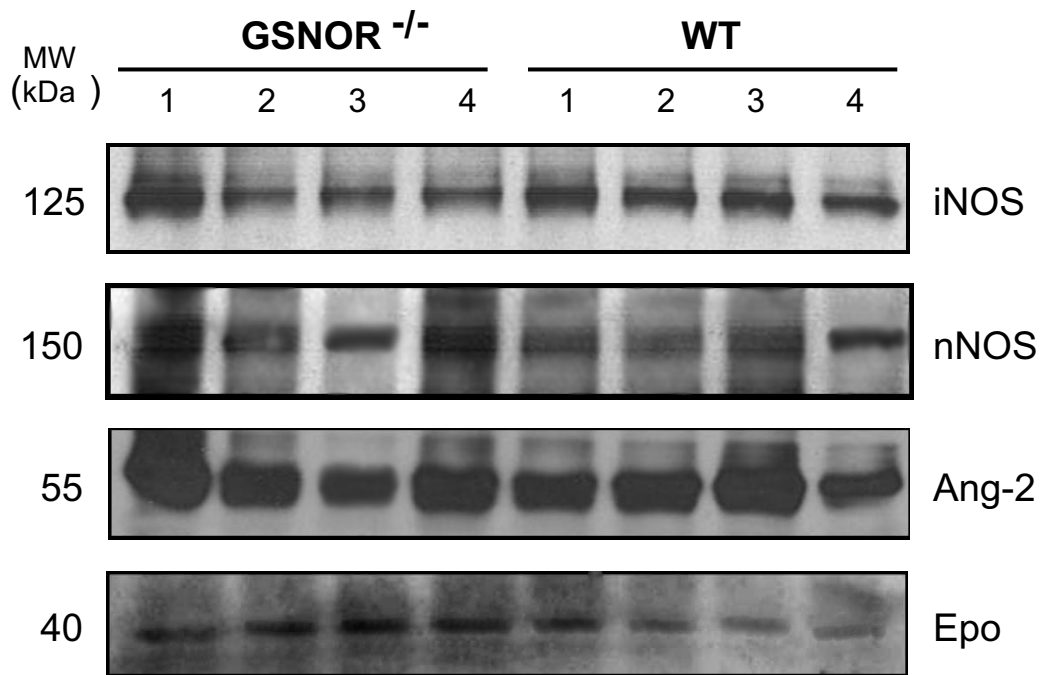

**Fig. S1.** Baseline levels of NOS isoforms, Epo, and angiogenic factors in WT and GSNOR<sup>-/-</sup> mice. Western blot analysis did not demonstrate a significant difference in the baseline levels of iNOS, nNOS, Ang-2, or Epo expression in WT and GSNOR<sup>-/-</sup> mice. (iNOS, inducible nitric oxide synthase; nNOS, neuronal nitric oxide synthase; Ang-2, angiotensin-2; Epo, erythropoietin.)
